# Supplementary material for: WITHDRAWN: Regulatory T cells enhance stem-like characteristics of hepatocellular carcinoma cells through Wnt/β-catenin pathway
Source: Research Square preprint supplement (doi:10.21203/rs.3.rs-111229/v1), 2020-11-23
Supplement: Supplementary file 1 [file ea7bd9778fec26688697f929.docx]

**Table S** Primer pairs used for quantitative real-time PCR

| **Gene** | **Sense (5’-3’)** | **Anti-sense (5’-3’)** |
| --- | --- | --- |
| GAPDH | AAGAAACCCTGGACCACCCAGC | TGGTATTCGAGAGAAGGGAGGG |
| Oct3/4 | GACAGGGGGAGGGGAGGAGCTAGG | CTTCCCTCCAACCAGTTGCCCCAAAC |
| Nanog | TCCAACATCCTGAACCTCAGCTA | AGTCGGGTTCACCAGGCATC |
| CD44 | GACGAAGACAGTCCCTGGAT | CTTCTTGACTCCCATGTGAG |
| CD133 | TGGATGCAGAACTTGACAACGT | ATACCTGCTACGACAGTCATGGT |
| CD13 | TTCAACATCACGCTTATCCACC | AGTCGAACTCACTGACAATGAAG |
| c-Myc | CACCATGCCCCTCAACGTGAACTTCACC | TTATGCACCAGAGTTTCGAAGCTGTTCG |
| Klf4 | GCGAACTCACACAGGCGAGAAACC | TCGCTTCCTCTTCCTCCGACACA |
| SOX2 | GGTTACCTCTTCCTCCCACTCCAG | TCACATGTGCGACAGGGGCAG |
| CD90 | ATGAAGGTCCTCTACTTATCCGC | GCACTGTGACGTTCTGGGA |
| FoxP3 | CACAACATGCGACCCCCTTTCACC | AGGTTGTGGCGGATGGCGTTCTTC |
